# Supplementary material for: circRNA-DURSA regulates trophoblast apoptosis via miR-760-HIST1H2BE axis in unexplained recurrent spontaneous abortion
Source: PubMed Central journal article supplement — Mol Ther Nucleic Acids. 2021 Jun 24;26:1433–45. doi: 10.1016/j.omtn.2021.06.012 (PMC8655312; doi:10.1016/j.omtn.2021.06.012), 2021-06-24
Supplement: mmc1.pdf [file mmc1.pdf]

OMTN, Volume 26

## **Supplemental information**

**circRNA-DURSA regulates trophoblast**

**apoptosis via miR-760-HIST1H2BE axis**

**in unexplained recurrent spontaneous abortion**

**Minyue Tang, Long Bai, Zhe Wan, Shan Wan, Yu Xiang, Yeqing Qian, Long Cui, Jiali You, Xiaoling Hu, Fan Qu, and Yimin Zhu**

**Table S1 Clinical characteristics of the women included in this study**

|                         | NP<br>(n=15)  | URSA<br>(n=15) | P value |
|-------------------------|---------------|----------------|---------|
| Age (year)              | 28.13 ± 1.28  | 29.07 ± 0.90   | 0.5166  |
| Gestational weeks (day) | 60.80 ± 2.064 | 64.27 ± 2.172  | 0.2802  |

**Table S2 Primers and RNA sequences used in this study**

| Gene                                                   | primers for Real-time PCR or sequences      |                       |
|--------------------------------------------------------|---------------------------------------------|-----------------------|
| circRNA0050703                                         | Forward                                     | CCCGAGAGTCTGGAGAACTC  |
|                                                        | Reverse                                     | TGTAGTCCATCCGAACCCTG  |
| circRNA0046770                                         | Forward                                     | CACCAAAATGCCACCCTTGA  |
|                                                        | Reverse                                     | CCAGTAGTACTTGGGAGCCA  |
| circRNA0042563                                         | Forward                                     | ACCCCAATACCAAGACCAACT |
|                                                        | Reverse                                     | TGGCTCTGGAAGTTGATCATG |
| circRNA0042569                                         | Forward                                     | GCGTGCAGAAACATTGGTCT  |
|                                                        | Reverse                                     | GGAGATGAGTTGTTGCTGCC  |
| circRNA0046769                                         | Forward                                     | TACAGAGCTGAGGACCATGC  |
|                                                        | Reverse                                     | GCCTGTGTGCTTAAAGTGAGT |
| GAPDH                                                  | Forward                                     | TGGTATCGTGGAAGGACTCA  |
|                                                        | Reverse                                     | ATGATGTTCTGGAGAGCCCC  |
| HIST1H2BE                                              | Forward                                     | CCGAAGAAGGGCTCCAAGAA  |
|                                                        | Reverse                                     | CCCCATGGCTTTAGAGGAGA  |
| WDR62                                                  | Forward                                     | GTGGTGGTGATTTTGGACCC  |
|                                                        | Reverse                                     | ATCTCCGCCACCTGATTCTT  |
| Has-miR-760                                            | GGCTCTGTGTCTGTGGGGAA                        |                       |
| circRNA-0050703<br>(circRNA-DURSA)<br>pull-down probes | 5'- GATGTCTCTGTTGCCTCACTCAGCAGGC -3' Biotin |                       |
| circRNA-0050703<br>(circRNA-DURSA)<br>siRNA-1          | Sense (5'-3')                               | CTGAGTGAGGCAACAGAGA   |
|                                                        | Anti-sense<br>(5'-3')                       | TCTCTGTTGCCTCACTCAG   |
| circRNA-0050703<br>(circRNA-DURSA)<br>siRNA-2          | Sense (5'-3')                               | CCTGCTGAGTGAGGCAACA   |
|                                                        | Anti-sense                                  | TGTTGCCTCACTCAGCAGG   |

|                          |                       |                     |
|--------------------------|-----------------------|---------------------|
|                          | (5'-3')               |                     |
| circRNA-0046770<br>siRNA | Sense (5'-3')         | TGAACTCAAGTAAACAGTA |
|                          | Anti-sense<br>(5'-3') | TACTGTTTACTTGAGTTCA |
| circRNA-0042563<br>siRNA | Sense (5'-3')         | TTTCTCCAAGTGGACAAAC |
|                          | Anti-sense<br>(5'-3') | GTTTGTCCACTTGGAGAAA |
| circRNA-0042569<br>siRNA | Sense (5'-3')         | AAGGATGCGGAAGGCAGCA |
|                          | Anti-sense<br>(5'-3') | TGCTGCCTTCCGCATCCTT |
| circRNA-0046769<br>siRNA | Sense (5'-3')         | TCTGTACAGCTGACTGCGT |
|                          | Anti-sense<br>(5'-3') | ACGCAGTCAGCTGTACAGA |

A

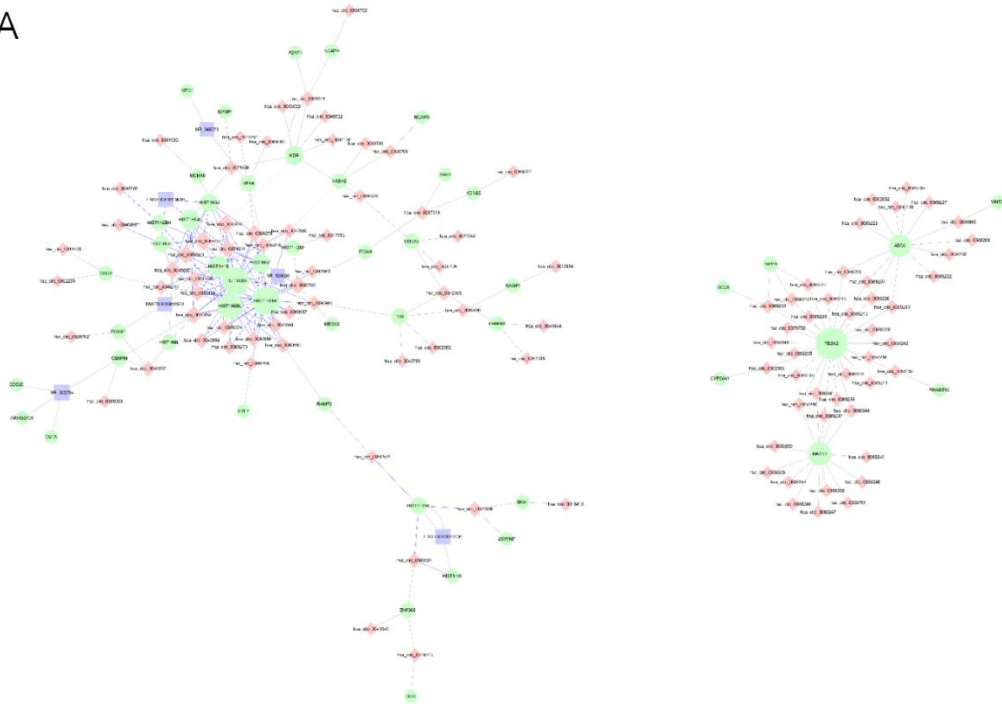

B

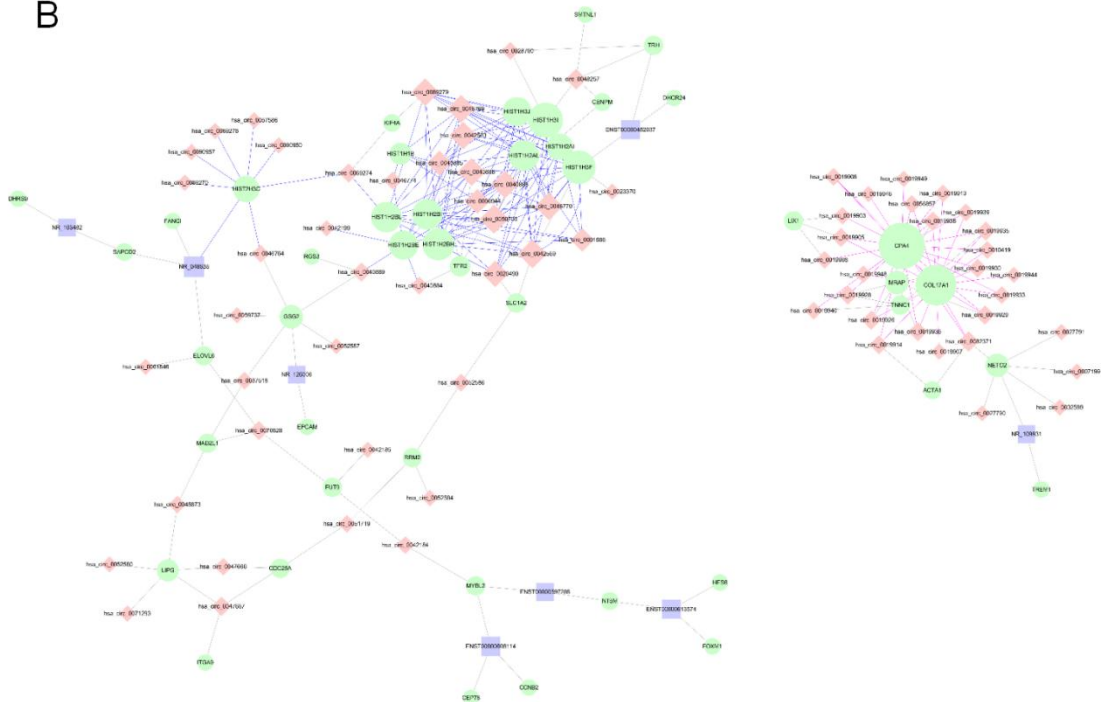

**Figure S1 CeRNA networks in the URSA and normal pregnancy groups**

(A) CeRNA networks in the URSA group. (B) CeRNA networks in the normal pregnancy group.

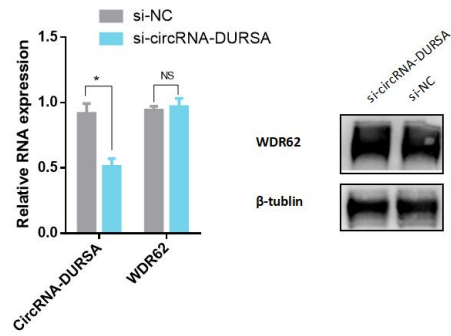

**Figure S2 The impact of si-circRNA-DURSA on the expression of WDR62**

WDR62 mRNA and protein expression levels were detected by western blot and qRT-PCR while silencing of circRNA-DURSA.

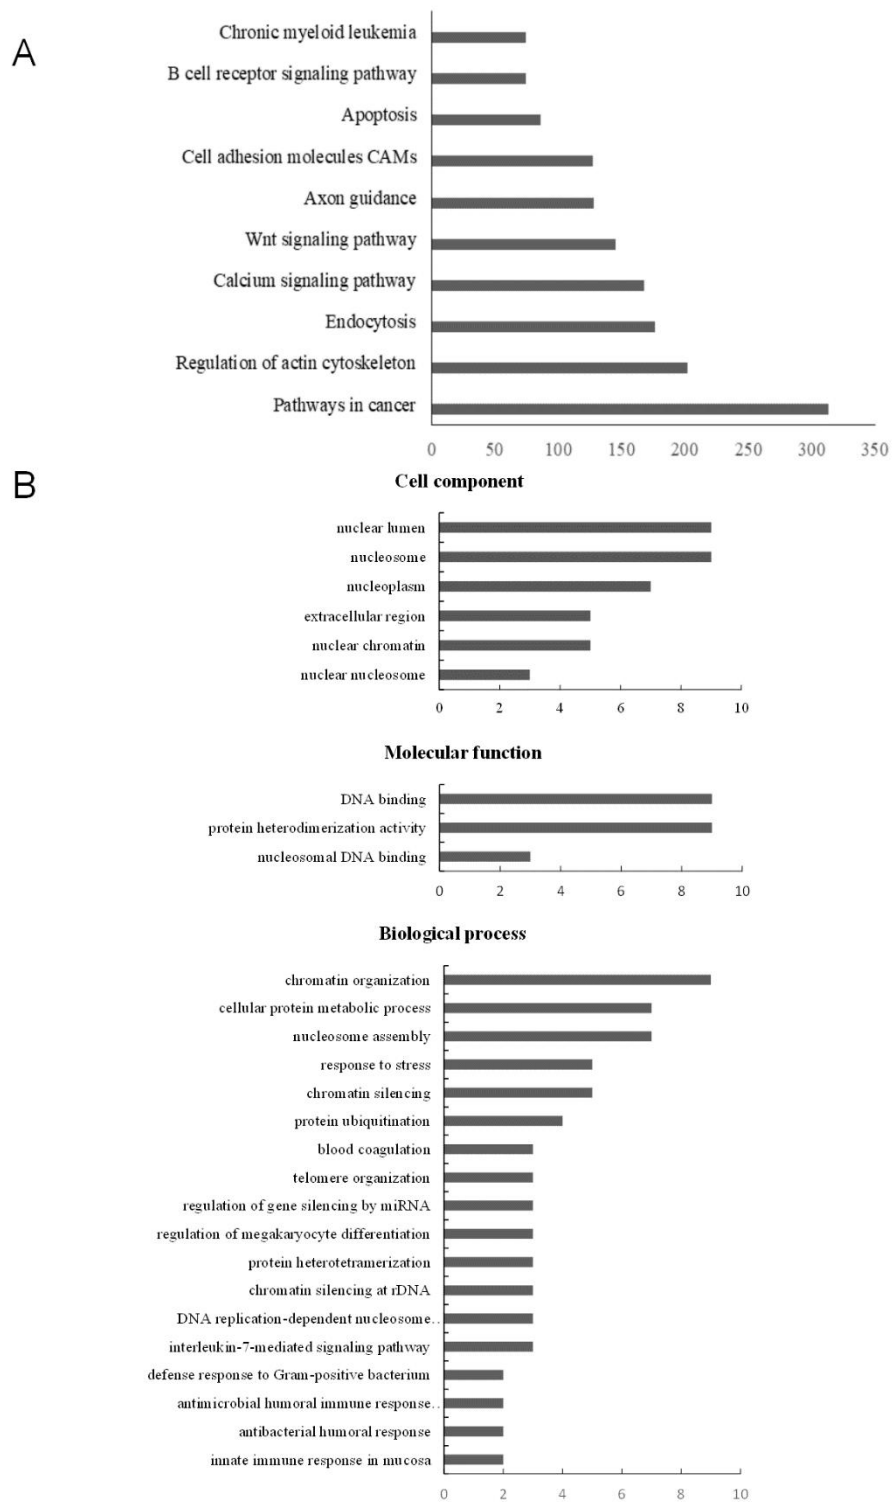

**Figure S3 KEGG and GO analysis of miR-760**

(A) The KEGG analysis of miR-760. (B) The GO analysis of miR-760.
